# Supplementary material
Source: PubMed Central journal article supplement (PMC6440785)
Supplement: JCM.01777-18-s0001.pdf [file JCM.01777-18-s0001.pdf]

**Supplementary Table 1:** Description of genes, Genbank accession numbers, primer sequences and size of the obtained products of the virulence related-genes targeted for diagnosis of enteropathogenic *Escherichia coli* (EPEC) in the study.

| Description of the target genes<br>(GenBank accession N°)                                   | Type of<br>PCR      | Primer sequence (5'→3')                                | Size<br>(bp) |
|---------------------------------------------------------------------------------------------|---------------------|--------------------------------------------------------|--------------|
| <b>Diagnostic genes</b>                                                                     |                     |                                                        |              |
| <i>eaeA</i> - intimin adherence protein                                                     | MAL-ED<br>Multiplex | CCCGAATTCGGCACAAGCATAAGC<br>CCCGGATCCGTCTCGCCAGTATTTCG | 881          |
| <i>bfpA</i> - bundle-forming pilus<br>structural gene (Type 4 pilin)                        |                     | GGAAGTCAAATTCATGGGGGTAT<br>GGAATCAGACGCAGACTGGTAGT     | 300          |
| <b>Virulence genes</b>                                                                      |                     |                                                        |              |
| <i>espB</i> - type III secreted proteins<br>(Z21555.1)                                      | Multiplex<br>1      | ATGGCAGCAAAAAGAGCCTAA<br>ATGGTCACCACATTGCAAGA          | 179          |
| <i>espD</i> - type III secreted proteins<br>(AF022236.1)                                    |                     | TGCCGGGTAAAAATAGCTG<br>TGCAAGCTCTGGCTATCCTT            | 304          |
| <i>tir</i> - translocated intimin receptor<br>(AF013122.1)                                  |                     | CTGCAGCGACCTCATCATAA<br>GATGCGAAGGGAAATGCTAT           | 535          |
| <i>nleB</i> - non-LEE-encoded type 3<br>secretion system dependent<br>effector (FM180568.1) |                     | ATATCGCCCTGTAGCGGATG<br>GAAAGGGTATCAAGCGGCAT           | 252          |
| <i>map</i> - LEE-encoded effector Map<br>(FM180568.1)                                       |                     | AGTCCAACGGCAATGGTAGG<br>AAAGCGCGATACAACAGCCT           | 357          |

|                                                                                                  |                |                                              |     |
|--------------------------------------------------------------------------------------------------|----------------|----------------------------------------------|-----|
| <i>espJ</i> - non-LEE encoded protein effector (inhibition of phagocytosis) (FM180568.1)         |                | TAACCACCACTCCCACACCA<br>CCAGAAACAGTCAGGCTGGA | 514 |
| <i>espL</i> - non-LEE encoded protein effector (Pseudogene) (FM180568.1)                         | Multiplex<br>2 | TCAGGCCCTTCAAAATGGAC<br>ACCTAAGCGAGTTCAGCGGA | 661 |
| <i>espC</i> - enterotoxin activity (induction of epithelial cell detachment) (U69128.1)          |                | TGATTCCGGGGCTTATTTTG<br>CTCATTCTGGTATGCCGGT  | 118 |
| <i>espZ</i> - T3SS effector translocation regulator (AF022236.1)                                 | Multiplex<br>3 | CACTGGCAGCCACAATCAAT<br>GCAATGTGTGTTGACGACCC | 169 |
| <i>espH</i> - LEE-encoded effector EspH (Modulating actin dynamics) (FM180568.1)                 |                | GCCATGCGTCATGGAATAAG<br>TATGGAGGCGTTACGAAGGC | 274 |
| <i>ler</i> - LEE-encoded regulator (AF200363.1)                                                  |                | TGCGAGAGCAGGAAGTTCAA<br>TGAAGAAGGGCAGACCTGGT | 168 |
| <i>espG</i> - LEE-encoded effector <i>EspG</i> (Microtubule disruption) (AF453442.1)             |                | GGGCTACACCATTCAGCTC<br>AGAAGCAGCAACGGCCATAT  | 280 |
| <i>nleE</i> - non-LEE encoded protein effector (PMN transepithelial and migration) (FM180568.1)  | Multiplex<br>4 | CAGGGCGTGTCCCCTATAAA<br>TGTGAGCTTCCGGACATTTG | 371 |
| <i>nleF</i> - non-LEE encoded protein effector (inhibited the TNF $\alpha$ pathway) (FM180568.1) |                | CCAACAAGTGGTTCTTCAGCA<br>AAATGCCTCGTGAAGGATG | 485 |
| <i>cesT</i> - Tir chaperone protein) (AB246811.1)                                                | Multiplex<br>5 | TGTGGAAAATTCCCGACAGA<br>TCAGGAGCACAATCGCTGTT | 119 |

|                                                                                                                  |                                               |     |
|------------------------------------------------------------------------------------------------------------------|-----------------------------------------------|-----|
| <i>espP</i> - serine protease<br>autotransporter (Cleavage of<br>spectrin, pepsin,<br>and factor V) (FM180568.1) | AGCCACAGATGGAGCTGGTT<br>GAACGGAGAAACGGTTCTGC  | 222 |
| <i>nleD</i> - no-LEE encoded protein<br>effector (inhibition of JNK-<br>dependent apoptosis)<br>(FM180568.1)     | TTCGTTTCCAGGGGACTGAT<br>AAATGGGGAGCGTTTGAAAG  | 348 |
| <i>nleC</i> - non-LEE encoded protein<br>effector (down-regulation of NF-<br>Kb<br>(FM180568.1)                  | CATTTTCGTGATGCCGTAAGC<br>ATGCAGAGCCAGAACGTGAA | 434 |

---

**NOTE.** The multiplex PCR conditions were one cycle for 15 min at 95 °C; 40 cycles of 95 °C for 30s, 58 °C for 30s and 72 °C for 30s and a extension step for 10 min at 72°C.
