# Supplementary material
Source: PubMed Central journal article supplement (PMC6440785)
Supplement: JCM.01777-18-s0002.pdf [file JCM.01777-18-s0002.pdf]

**Supplementary Table 2:** Prevalence of virulence related-genes (VRGs) of enteropathogenic *Escherichia coli* (EPEC) among children infected with atypical EPEC and typical EPEC with and without diarrhea (cases and controls) from Brazilian semiarid region.

| VRGs        | Encoded factors        | Typical EPEC<br>N = 29 (%) | Atypical EPEC<br>N = 308 (%) | Total<br>N = 337 (%) | Univariable<br>P value/OR/95%IC | Multivariable<br>P value/OR/95%IC |
|-------------|------------------------|----------------------------|------------------------------|----------------------|---------------------------------|-----------------------------------|
| <i>espC</i> | Enterotoxin            | 14 (48.2)                  | 128 (41.5)                   | 142 (42.1)           | 0.5565/1.31/0.61 – 2.81         | 0.244/0.60/ -                     |
| <i>espP</i> | Protease               | 11 (37.9)                  | 128 (41.5)                   | 139 (41.2)           | 0.8441/0.85/0.39 – 1.88         | 0.411/1.43/ -                     |
| <i>tir</i>  | Intimin                | 5 (17.2)                   | 44 (14.2)                    | 61 (18.1)            | 0.5903/1.25/0.45 – 3.45         | 0.623/0.76/ -                     |
| <i>map</i>  | LEE encoded effector   | 11 (37.9)                  | 178 (57.7)                   | 189 (56.0)           | 0.0498*/2.24/1.02 – 4.90        | 0.051/2.20/0.99 – 4.89            |
| <i>espH</i> |                        | 12 (41.3)                  | 144 (46.7)                   | 156 (46.2)           | 0.6977/0.80/0.37 – 1.74         | 0.84/1.08/0.49 – 2.38             |
| <i>espB</i> | T3SS effectors         | 18 (62.0)                  | 168 (54.5)                   | 186 (55.1)           | 0.5586/1.36/0.62 – 2.98         | 0.433/0.71/0.31 – 1.64            |
| <i>espD</i> |                        | 13 (44.8)                  | 112 (36.0)                   | 125 (37.0)           | 0.4225/1.42/0.65 – 3.06         | 0.422/0.72/0.32 – 1.60            |
| <i>espZ</i> |                        | 12 (41.3)                  | 123 (39.9)                   | 135 (40.0)           | 1.0000/1.06/0.48 – 2.30         | 0.849/0.92/0.40 – 2.09            |
| <i>nleB</i> |                        | 11 (37.9)                  | 108 (35.0)                   | 119 (35.3)           | 0.8394/1.12/0.51 – 2.48         | 0.882/0.94/0.41 – 2.12            |
| <i>cesT</i> |                        | 16 (55.1)                  | 185 (60.0)                   | 201 (59.6)           | 0.6931/0.81/0.38 – 1.76         | 0.436/1.37/0.61 – 3.06            |
| <i>ler</i>  | LEE encoded regulators | 18 (62.0)                  | 225 (73.0)                   | 243 (72.1)           | 0.2776/0.60/0.27 – 1.33         | 0.141/1.84/ -                     |
| <i>espJ</i> | No-LEE                 | 7 (24.1)                   | 94 (30.5)                    | 101 (29.9)           | 0.5323/0.72/0.29 – 1.75         | 0.547/1.35/0.5 – 3.69             |
| <i>espL</i> |                        | 9 (31.0)                   | 122 (39.6)                   | 131 (38.8)           | 0.4290/0.68/0.30 – 1.55         | 0.619/1.26/0.49 – 3.23            |
| <i>espG</i> |                        | 16 (55.1)                  | 190 (61.6)                   | 206 (61.1)           | 0.5517/0.76/0.35 – 1.64         | 0.482/1.34/0.58 – 3.06            |
| <i>nleE</i> |                        | 7 (24.1)                   | 96 (31.1)                    | 103 (30.5)           | 0.5299/0.70/0.29 – 1.70         | 0.494/1.39/0.53 – 3.61            |
| <i>nleF</i> |                        | 11 (37.9)                  | 117 (37.9)                   | 128 (37.9)           | 1.0000/0.99/0.45 – 2.18         | 0.726/0.86/0.37 – 1.99            |
| <i>nleD</i> |                        | 5 (17.2)                   | 39 (12.6)                    | 44 (13.0)            | 0.5611/1.43/0.51 – 3.98         | 0.772/0.84/0.28 – 2.56            |

|             |           |           |            |                            |                           |
|-------------|-----------|-----------|------------|----------------------------|---------------------------|
| <i>nleC</i> | 12 (41.3) | 96 (31.1) | 108 (32.0) | 0.2989/1.55/0.71 –<br>3.39 | 0.186/0.56/0.23 –<br>1.32 |
|-------------|-----------|-----------|------------|----------------------------|---------------------------|

---
