# Supplementary material
Source: PubMed Central journal article supplement (PMC6440785)
Supplement: JCM.01777-18-s0003.pdf [file JCM.01777-18-s0003.pdf]

**Supplementary Table 3:** Prevalence of virulence related-genes (VRGs) of enteropathogenic *Escherichia coli* (EPEC) among children infected with atypical EPEC with and without diarrhea (cases and controls) from Brazilian semiarid region.

| VRGs        | Encoded factors        | Cases<br>N = 174 (%) | Controls<br>N = 163 (%) | Total<br>N = 337 (%) | Univariable<br>P value/OR/95%IC | Multivariable<br>P value/OR/95%IC |
|-------------|------------------------|----------------------|-------------------------|----------------------|---------------------------------|-----------------------------------|
| <i>espC</i> | Enterotoxin            | 68 (39.0)            | 60 (36.8)               | 128 (37.9)           | 0.7363/1.10/0.70 – 1.71         | 0.16/1.42/0.87 – 2.33             |
| <i>espP</i> | Protease               | 61 (35.0)            | 67 (41.1)               | 128 (37.9)           | 0.2634/0.77/0.49 – 1.20         | 0.197/0.72/0.44 – 1.18            |
| <i>tir</i>  | Intimin                | 25 (14.3)            | 19 (11.6)               | 44 (13.0)            | 0.5191/1.27/0.67 – 2.41         | 0.289/1.42/0.74 – 2.74            |
| <i>map</i>  | LEE encoded effector   | 92 (52.8)            | 86 (52.7)               | 178 (52.8)           | 1.0000/1.00/0.65 – 1.54         | 0.369/1.23/0.78 – 1.94            |
| <i>espH</i> |                        | 73 (41.9)            | 71 (43.5)               | 144 (42.7)           | 0.8257/0.93/0.60 – 1.44         | 0.922/1.02/0.65 – 1.60            |
| <i>espB</i> | T3SS effectors         | 86 (49.4)            | 82 (50.3)               | 168 (49.8)           | 0.9134/0.96/0.62 – 1.48         | 0.789/1.06/0.65 – 1.73            |
| <i>espD</i> |                        | 60 (34.4)            | 52 (31.9)               | 112 (33.2)           | 0.6446/1.12/0.71 – 1.76         | 0.178/1.39/0.85 – 2.26            |
| <i>espZ</i> |                        | 66 (37.9)            | 57 (34.9)               | 123 (36.4)           | 0.6508/1.13/0.72 – 1.77         | 0.252/1.32/0.81 – 2.15            |
| <i>nleB</i> |                        | 57 (32.7)            | 51 (31.2)               | 108 (32.0)           | 0.8157/1.07/0.67 – 1.69         | 0.604/1.13/0.69 – 1.84            |
| <i>cesT</i> |                        | 92 (52.8)            | 93 (57.0)               | 185 (54.8)           | 0.4458/0.84/0.54 – 1.29         | 0.796/0.93/0.57 – 1.52            |
| <i>ler</i>  | LEE encoded regulators | 107 (61.4)           | 118 (72.3)              | 225 (66.7)           | 0.0376*/1.64/1.03 – 2.60        | 0.167/0.69/0.41 – 1.16            |
| <i>espJ</i> | No-LEE                 | 44 (25.2)            | 50 (30.6)               | 94 (27.8)            | 0.2770/0.76/0.47 – 1.23         | 0.546/0.84/0.47 – 1.47            |
| <i>espL</i> |                        | 64 (36.7)            | 58 (35.5)               | 122 (36.2)           | 0.8217/1.05/0.67 – 1.64         | 0.253/1.36/0.80 – 2.31            |
| <i>espG</i> |                        | 97 (55.7)            | 93 (57.0)               | 190 (56.3)           | 0.8267/0.94/0.60 – 1.55         | 0.873/1.04/0.63 – 1.69            |
| <i>nleE</i> |                        | 49 (28.1)            | 47 (28.8)               | 96 (28.4)            | 0.9044/0.96/0.60 – 1.55         | 0.676/1.11/0.66 – 1.87            |
| <i>nleF</i> |                        | 58 (33.3)            | 59 (36.1)               | 117 (34.7)           | 0.6472/0.88/0.56 – 1.38         | 0.94/0.98/0.60 – 1.59             |
| <i>nleD</i> |                        | 24 (13.7)            | 15 (9.2)                | 39 (11.5)            | 0.2333/1.57/0.79 – 3.12         | 0.068/2/0.95 – 4.20               |
| <i>nleC</i> |                        | 45 (25.8)            | 51 (31.2)               | 96 (28.4)            | 0.2797/0.76/0.47 – 1.23         | 0.163/0.67/0.39 – 1.17            |
