# Supplementary material
Source: PubMed Central journal article supplement (PMC6440785)
Supplement: JCM.01777-18-s0004.pdf [file JCM.01777-18-s0004.pdf]

**Supplementary Table 4:** Prevalence of virulence related-genes (VRGs) of enteropathogenic *Escherichia coli* (EPEC) among children infected with typical EPEC with and without diarrhea (cases and controls) from Brazilian semiarid region.

|             | <b>Cases<br/>(n=174)</b> | <b>Controls<br/>(n=163)</b> | <b>Total<br/>(n=337)</b> | <b>P value</b> | <b>Odds<br/>Ratio</b> | <b>95% IC</b> |
|-------------|--------------------------|-----------------------------|--------------------------|----------------|-----------------------|---------------|
|             | N° (%)                   | N° (%)                      | N° (%)                   |                |                       |               |
| <i>EspB</i> | 14 (8.0)                 | 4 (2.4)                     | 18 (5.3)                 | <b>0.0281*</b> | 3.47                  | 1.12 – 10.80  |
| <i>EspD</i> | 9 (5.1)                  | 4 (2.4)                     | 13 (3.8)                 | 0.2608         | 2.16                  | 0.65 – 7.18   |
| <i>Tir</i>  | 2 (1.2)                  | 3 (1.8)                     | 5 (1.5)                  | 0.6759         | 0.62                  | 0.10 – 3.76   |
| <i>NleB</i> | 9 (5.1)                  | 2 (1.2)                     | 11 (3.2)                 | 0.0627         | 4.39                  | 0.93 – 20.64  |
| <i>Map</i>  | 7 (4.0)                  | 4 (2.4)                     | 11 (3.2)                 | 0.5445         | 1.66                  | 0.47 – 5.80   |
| <i>EspJ</i> | 5 (2.9)                  | 2 (1.2)                     | 7 (2.1)                  | 0.4500         | 2.38                  | 0.45 – 12.46  |
| <i>EspL</i> | 6 (3.4)                  | 3 (1.8)                     | 9 (2.7)                  | 0.5040         | 1.90                  | 0.46 – 7.74   |
| <i>EspC</i> | 8 (4.6)                  | 6 (3.7)                     | 14 (4.1)                 | 0.7877         | 1.26                  | 0.42 – 3.71   |
| <i>EspZ</i> | 8 (4.6)                  | 4 (2.4)                     | 12 (3.5)                 | 0.3821         | 1.91                  | 0.56 – 6.48   |
| <i>EspH</i> | 7 (4.0)                  | 5 (3.1)                     | 12 (3.5)                 | 0.7718         | 1.32                  | 0.41 – 4.26   |
| <i>Ler</i>  | 12 (6.9)                 | 6 (3.7)                     | 18 (5.3)                 | 0.2297         | 1.93                  | 0.70 – 5.29   |
| <i>EspG</i> | 10 (5.7)                 | 6 (3.7)                     | 16 (4.7)                 | 0.4474         | 1.59                  | 0.56 – 4.49   |
| <i>NleE</i> | 3 (1.7)                  | 4 (2.4)                     | 7 (2.1)                  | 0.7159         | 0.69                  | 0.15 – 3.16   |
| <i>NleF</i> | 7 (4.0)                  | 4 (2.4)                     | 11 (3.2)                 | 0.5445         | 1.66                  | 0.47 – 5.80   |
| <i>CesT</i> | 11 (6.3)                 | 5 (3.1)                     | 16 (4.7)                 | 0.2031         | 2.13                  | 0.72 – 6.27   |
| <i>EspP</i> | 6 (3.4)                  | 5 (3.1)                     | 11 (3.2)                 | 1.0000         | 1.12                  | 0.33 – 3.77   |
| <i>NleD</i> | 4 (2.3)                  | 1 (0.6)                     | 5 (1.5)                  | 0.3726         | 3.81                  | 0.42 – 34.48  |
| <i>NleC</i> | 8 (4.6)                  | 4 (2.4)                     | 12 (3.5)                 | 0.3821         | 1.19                  | 0.56 – 6.48   |
